# Supplementary material
Source: PubMed Central journal article supplement (PMC6584315)
Supplement: jamasurg-153-918-s001.pdf [file jamasurg-153-918-s001.pdf]

## Supplementary Online Content

Jung JP, Zenati MS, Dhir M, et al. Use of video review to investigate technical factors that may be associated with delayed gastric emptying after pancreaticoduodenectomy. *JAMA Surg*. Published online July 11, 2018.  
doi:10.1001/jamasurg.2018.2089

**eTable.** Descriptive Analysis of Patient Variables in the Entire Cohort With and Without Video

This supplementary material has been provided by the authors to give readers additional information about their work.

**eTable.** Descriptive Analysis of Patient Variables in the Entire Cohort With and Without Video

|                                                            | Entire Cohort<br>[N=410] (%) | NoVideo Cohort<br>[N=218] (%) | Video Cohort<br>[N=192] (%) | P Value         |
|------------------------------------------------------------|------------------------------|-------------------------------|-----------------------------|-----------------|
| <b>A. Demographic and Pre-operative Clinical Variables</b> |                              |                               |                             |                 |
| Age (years)                                                | 66.4±11.6                    | 67.1±12.0                     | 65.7±11.1                   | .21             |
| Sex                                                        |                              |                               |                             | .13             |
| Male                                                       | 223(54.4)                    | 111(50.9)                     | 112(58.3)                   |                 |
| Female                                                     | 187(45.6)                    | 107(49.1)                     | 80(41.7)                    |                 |
| CCI age unadjusted                                         | 2.44±1.4                     | 2.33±1.5                      | 2.56±1.3                    | .09             |
| CCI age adjusted                                           | 4.58±2.1                     | 4.51±2.3                      | 4.66±1.9                    | .46             |
| BMI (Kg/m <sup>2</sup> )                                   | 27.5±5.6                     | 27.6±5.7                      | 27.4±5.5                    | .63             |
| Prior abdominal surgery history                            | 221(54.3)                    | 118(54.9)                     | 103(53.6)                   | .80             |
| ASA                                                        |                              |                               |                             | <b>.03</b>      |
| 1                                                          | 1(0.3)                       | 0(0.0)                        | 1(0.5)                      |                 |
| 2                                                          | 71(17.3)                     | 47(21.6)                      | 24(12.5)                    |                 |
| 3                                                          | 316(77.0)                    | 162(74.3)                     | 154(80.2)                   |                 |
| 4                                                          | 22(5.4)                      | 9(4.1)                        | 13(6.8)                     |                 |
| Preoperative albumin (g/dl)                                | 3.63±0.58                    | 3.57±0.60                     | 3.70±0.55                   | <b>.03</b>      |
| Cancer                                                     | 338(82.6)                    | 175(81.0)                     | 163(84.9)                   | .26             |
| PDA                                                        | 192(46.3)                    | 105(48.2)                     | 87(45.3)                    | .56             |
| Neoadjuvant therapy                                        | 114(27.9)                    | 47(21.8)                      | 67(34.9)                    | <b>.003</b>     |
| <b>B. Intra-operative Clinical Variables</b>               |                              |                               |                             |                 |
| Duct size (mm)                                             | 3 (2-5)                      | 4 (2.5-6)                     | 3 (2-5)                     | .04             |
| Dilated duct (>3mm)                                        | 186(47.0)                    | 109(51.5)                     | 77(41.9)                    | .057            |
| Soft pancreas texture                                      | 244(63.5)                    | 128(62.4)                     | 116(64.8)                   | .63             |
| Operation time (min)                                       | 425±111                      | 469±121                       | 374±70                      | <b>&lt;.001</b> |
| EBL (ml)                                                   | 250<br>(150-400)             | 250<br>(150-500)              | 200<br>(114-350)            | <b>.001</b>     |
| EBL > 500ml                                                | 90(22.0)                     | 64(29.5)                      | 26(13.5)                    | <b>&lt;.001</b> |
| RBC transfusion                                            | 68(16.6)                     | 47(21.6)                      | 21(11.0)                    | <b>.004</b>     |
| RBC units in patients who actually transfused              | 2(1-3)                       | 2(1-4)                        | 2(1-2)                      | .53             |
| Converted to open                                          | 19(4.6)                      | 19(8.7)                       | 0(0)                        | <b>&lt;.001</b> |
| <b>C. Post-operative Clinical Variables</b>                |                              |                               |                             |                 |
| POPF                                                       | 86(21.0)                     | 49(19.3)                      | 44(22.9)                    | .32             |
| POPF (B and C)                                             | 37(9.0)                      | 21(9.6)                       | 16(8.4)                     | .65             |
| Pseudo-aneurysm                                            | 17(4.2)                      | 11(5.1)                       | 6(3.1)                      | .33             |
| DGE                                                        | 88(21.5)                     | 47(21.6)                      | 41(21.4)                    | .96             |
| Max Clavien-Dindo                                          |                              |                               |                             | .54             |
| 0                                                          | 118(28.8)                    | 65(29.9)                      | 53(27.6)                    |                 |
| 1                                                          | 50(12.2)                     | 23(10.6)                      | 27(14.1)                    |                 |
| 2                                                          | 132(32.2)                    | 65(29.8)                      | 67(34.9)                    |                 |
| 3                                                          | 48(11.7)                     | 28(12.8)                      | 20(10.4)                    |                 |
| 4                                                          | 49(12.0)                     | 28(12.8)                      | 21(10.9)                    |                 |
| 5                                                          | 13(3.2)                      | 9(4.1)                        | 4(2.1)                      |                 |
| Max Clavien-Dindo ≥3                                       | 110(26.8)                    | 65(29.8)                      | 45(23.4)                    | .15             |
| LOS (day)                                                  | 8(6-12)                      | 9(7-13)                       | 7(6-10)                     | <b>.002</b>     |
| Re-admission                                               | 144(35.1)                    | 76(34.9)                      | 68(35.4)                    | .91             |
| Re-operation                                               | 18(4.4)                      | 11(5.3)                       | 7(3.7)                      | .49             |
| 30-day mortality                                           | 5(1.2)                       | 4(1.8)                        | 1(0.6)                      | .38             |
| 90-day mortality                                           | 12(2.9)                      | 8(3.7)                        | 4(2.1)                      | .39             |

Abbreviations: RPD, Robotic pancreaticoduodenectomy; DGE, Delayed gastric emptying; CCI, Charlson comorbidity index; BMI, Body mass index; ASA, American society of anesthesiologists classification; PDA, Pancreatic adenocarcinoma; GJ, Gastrojejunostomy; EBL, Estimated blood loss; RBC, Red blood cell; POPF, Post-operative pancreatic fistula; Max Clavien-Dindo, Maximum Clavien-Dindo classification;<sup>34</sup> LOS, Length of stay.
